# Supplementary material for: Efficacy, safety, and predictive model of Palbociclib in the treatment of HR-positive and HER2-negative metastatic breast cancer
Source: Springer Nature journal article supplement (doi:10.1186/s12885-023-11764-8), 2024-01-02
Supplement: MOESM1 [file 26582976]

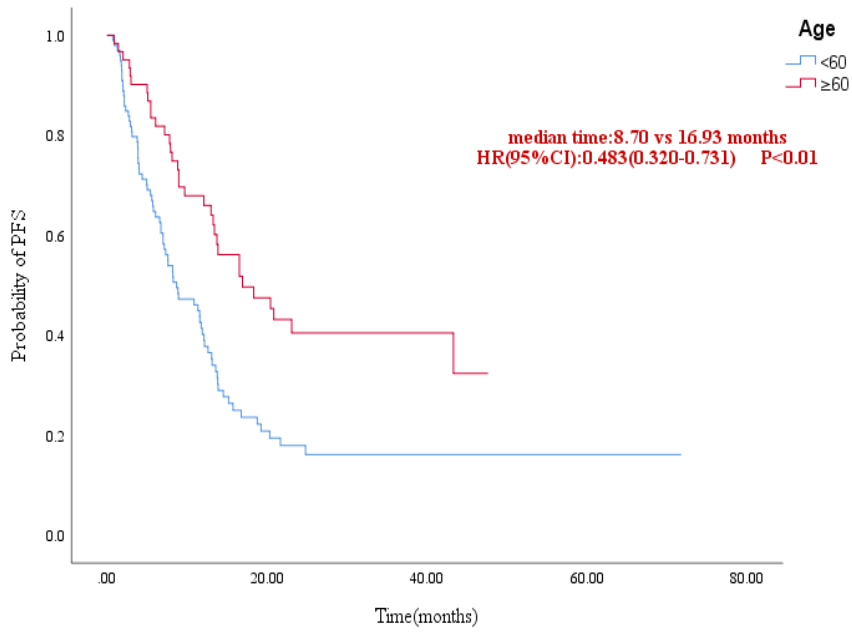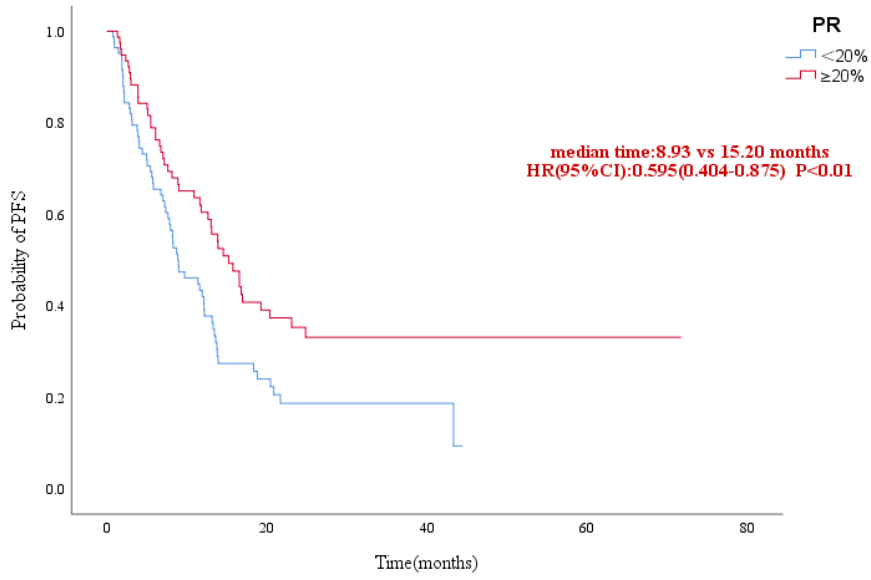

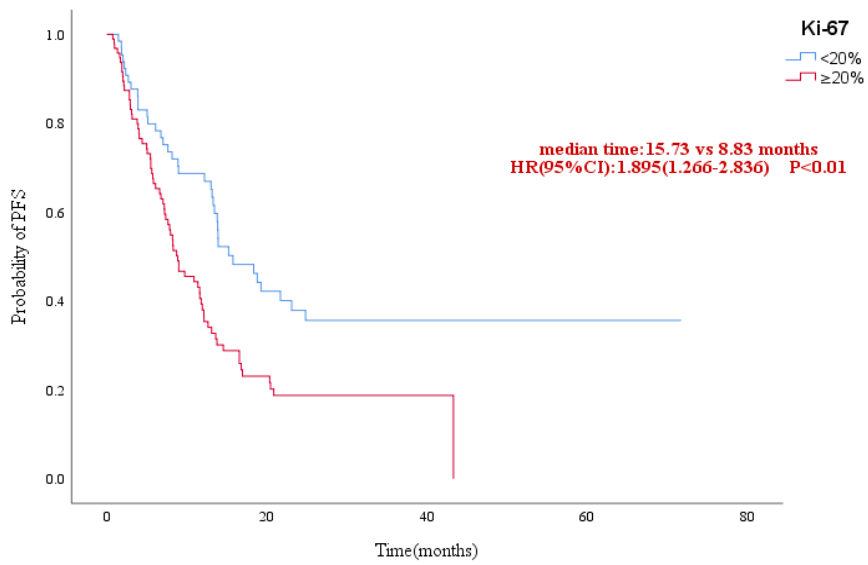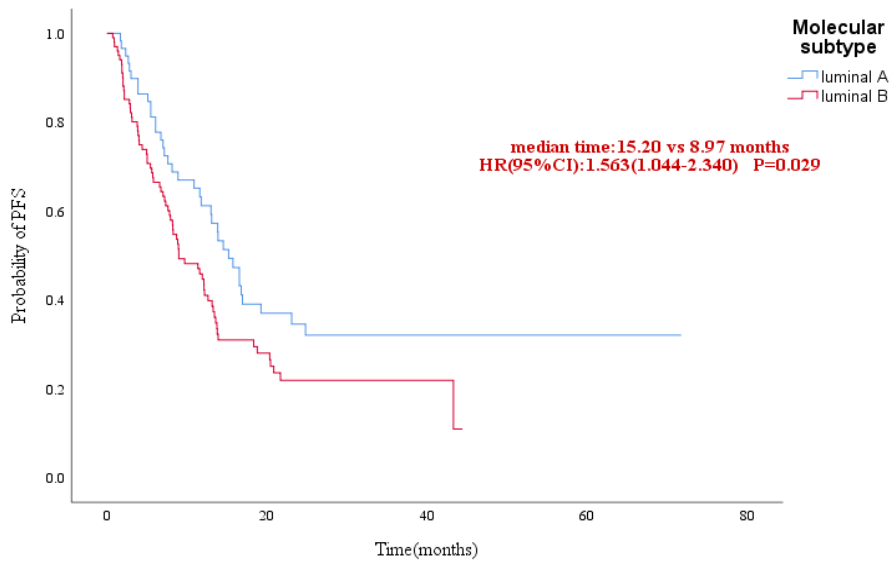

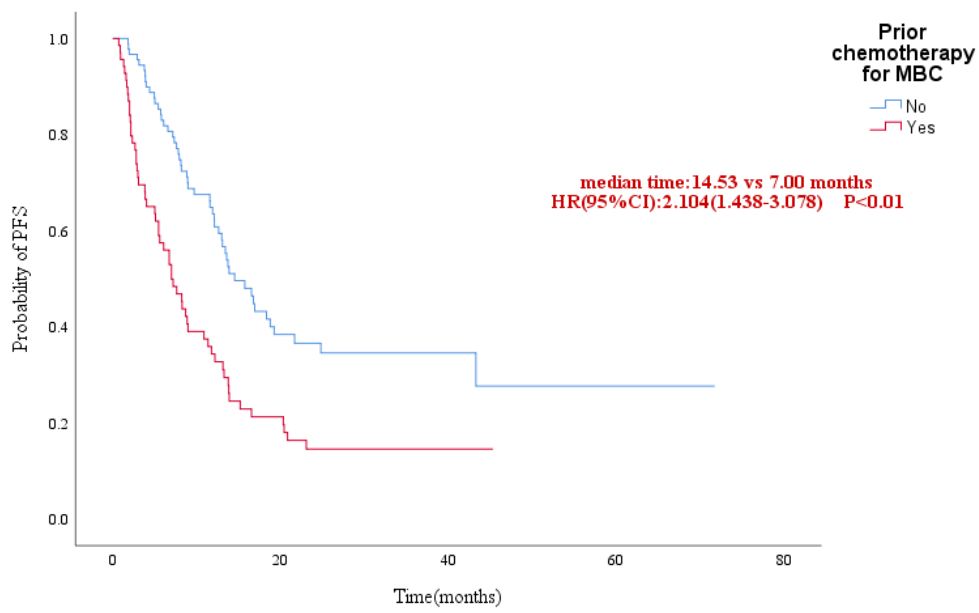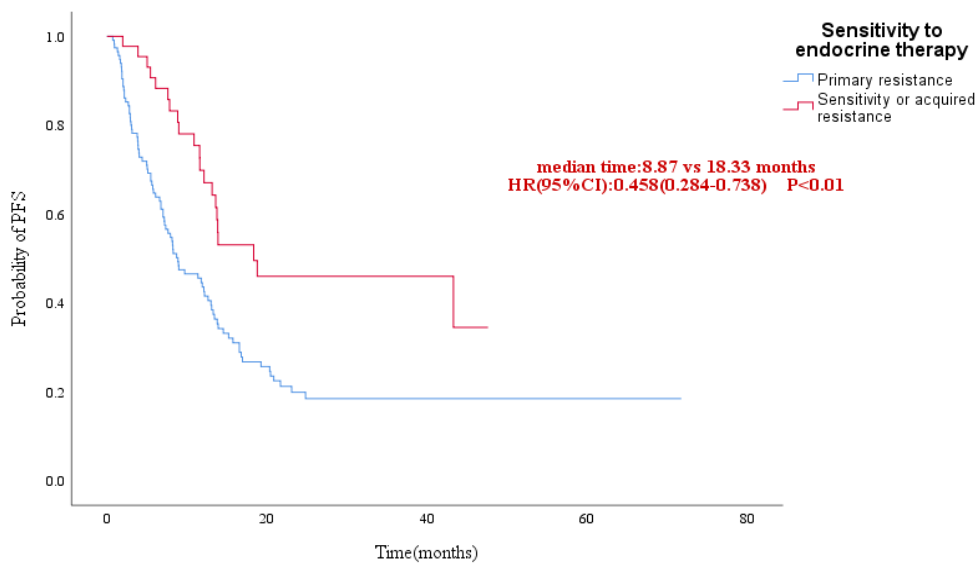

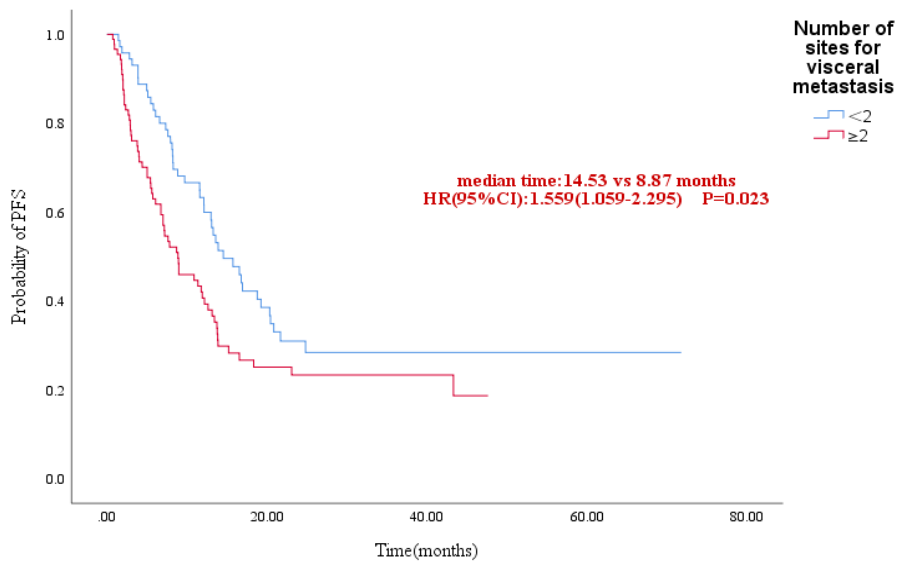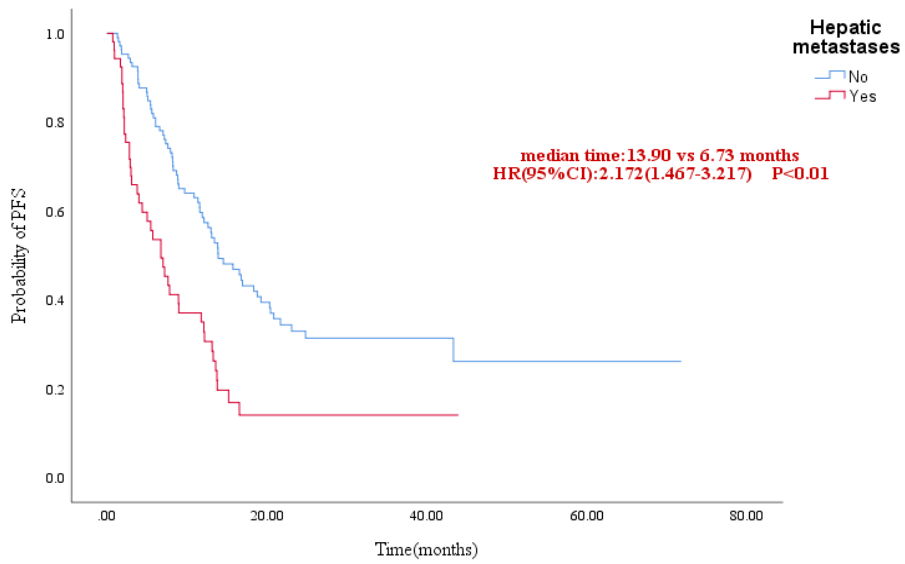

Supplementary Figure 1.PFS comparisons in subgroups
